# Supplementary material for: Insights into hydroxyl measurements and atmospheric oxidation in a California forest
Source: Copernicus journal article supplement (doi:10.5194/acp-12-8009-2012), 2012-09-07
Supplement: Supplementary file 1 [file acp-12-8009-2012-supplement.pdf]

## Supplemental material

### Supplemental discussion of internal OH and its possible removal by C<sub>3</sub>F<sub>6</sub> addition

OH<sub>chem</sub> represents the real OH and OH<sub>wave</sub>-OH<sub>chem</sub> represents an instrument interference only if no internal OH is removed when C<sub>3</sub>F<sub>6</sub> is added. This can be seen in the following analysis.

The total detected OH by wavelength modulation is the sum of ambient OH (OH<sub>ambient</sub>) and internal OH (OH<sub>internal</sub>), whereas OH detected by chemical removal is the sum of the ambient OH and the fraction of internal OH that is removed. So

$$OH_{wave} = OH_{ambient} + OH_{internal}$$

$$OH_{chem} = OH_{ambient} + (1 - \alpha)OH_{internal}$$

where  $\alpha$  is the fraction of internal produced OH remaining from the external addition of C<sub>3</sub>F<sub>6</sub>. Assuming

$$x = \frac{OH_{chem}}{OH_{wave}}$$

The relationship between OH<sub>ambient</sub> and OH<sub>wave</sub> can then be described as

$$f = \frac{OH_{ambient}}{OH_{chem}} = \frac{\alpha + x - 1}{\alpha x}$$

For  $\alpha = 1$ ,  $f = 1$  and  $OH_{chem} = OH_{ambient}$ , no matter what  $x$  is. For  $\alpha = 0.8$ , when  $x = 0.4$ ,  $f = 0.63$ , and when  $x = 0.5$ ,  $f = 0.75$ . This analysis suggests that the ambient OH equals .63 to 1 times OH<sub>chem</sub>, depending on where the internal OH is being generated. The question then is “Where is the internal OH being generated?”

A key to determining the source of the internal OH is the removal from OH generated by Hg lamps 1, 2, and 3 by the addition of different amounts of C<sub>3</sub>F<sub>6</sub> (Zhang et al., manuscript in preparation). The shapes of the three removal curves are very different, with the shape of the removal more curved for external OH, less curved for OH produced near the inlet (Hg lamp 2) and small but slowly increasing for OH produced in the detection axis (Hg lamp 3). If OH were generated near the inlet, the ratio of OH<sub>chem</sub> to OH<sub>wave</sub> would go to less than 10% as more C<sub>3</sub>F<sub>6</sub> was added because both external OH and internal OH generated near the inlet are effectively removed when more than 4 sccm of C<sub>3</sub>F<sub>6</sub> were added. If OH were generated in the detection axis, the OH<sub>chem</sub> to OH<sub>wave</sub>

effectively levels off because most of the external OH is removed while little of the internal OH is. The curve of OH produced from ozone and MBO or  $\beta$ -pinene matches a curve that combines curves with about 50% from external OH, 14% from internal OH generated near the inlet, and 36% from OH generated in the detection axis. Applying the laboratory-derived remaining internal OH,  $\alpha$ , ( $0.83 \pm 0.08$ ) to the BEARPEX09-observed average  $\text{OH}_{\text{chem}}/\text{OH}_{\text{wave}}$  (0.50), the equation for  $\text{OH}_{\text{ambient}}/\text{OH}_{\text{chem}}$  equals  $0.80 \pm 0.12$ . We apply this correction to  $\text{OH}_{\text{chem}}$  but retain the name “ $\text{OH}_{\text{chem}}$ ” for this corrected value. **Because we have quantified the internal OH loss and corrected  $\text{OH}_{\text{chem}}$  for it,  $\text{OH}_{\text{chem}}$  is a quantitative measure of the real OH.**

### **Model mechanism tests**

The base photochemical box model uses the Regional Atmospheric Chemistry Mechanism, Version 2 (RACM2) mechanism (Henderson et al., 2011). The “RACM2 + IEPOX” scheme was modified by replacing isoprene oxidation in RACM2 with the isoprene nitrate chemistry described in Paulot et al. (2009a) and the isoprene epoxide chemistry in Paulot et al. (2009b). The “RACM2 + IEPOX + Isomerization” scheme was modified based on “RACM2 + IEPOX”, by adding the unimolecular isomerization mechanism described by Peeters et al. (Peeters et al., 2009) and Peeters and Müller (2010). The “RACM2 + IEPOX + Reduced Isomerization” was modified based on “RACM2 + IEPOX + Isomerization”, by using the reduced rate of isomerization for isoprene hydroxylperoxy radicals suggested by Crouse et al. (Crouse et al., 2011). The MBO oxidation was explicitly treated in “RACM2 + IEPOX”, “RACM2 + IEPOX + Isomerization” and “RACM2 + IEPOX + Reduced Isomerization”, following Carrasco et al. (2007), Steiner et al. (2007), and Chan et al. (2009). Photooxidation of monoterpenes and sesquiterpenes was based on Wolfe and Thornton (2011). Photolysis rates were calculated by the Tropospheric Ultraviolet and Visible (TUV) radiation model and then scaled based on the Photosynthetically Active Radiation (PAR) measurements.

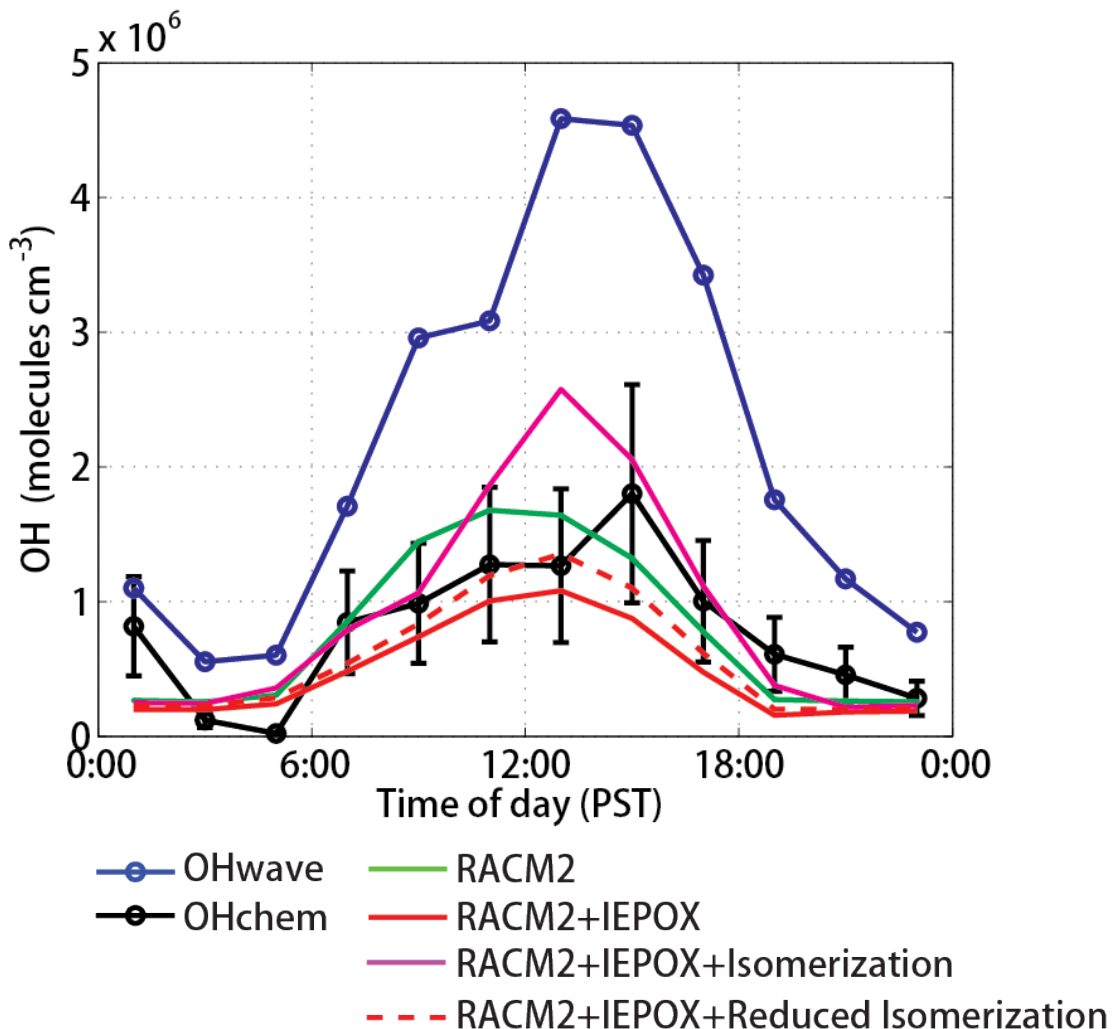

Figure S1. Diurnal cycle of measured and modeled OH between 20 June and 30 July 2009 near the Blodgett Forest Research Station (BFRS). “OHwave” is represented by blue open circles and “OHchem” by black open circles. The vertical bars indicate OHchem’s absolute uncertainty of  $\pm 45\%$  ( $2\sigma$  confidence), which comes from combining the uncertainty from the internally generated OH is removed by the  $C_3F_6$  addition used to measure OHchem ( $\pm 20\%$ ) and the absolute uncertainty of the OH measurements ( $\pm 40\%$  at  $2\sigma$  confidence). Note that OHchem here is corrected by 0.80 to account for the removal of internal OH by  $C_3F_6$  addition. Model results are shown as the base RACM2 model (green solid lines), the “RACM2 + IEPOX” scheme (red solid lines), the “RACM2 + IEPOX + Isomerization” scheme (magenta solid lines), and the “RACM2 + IEPOX + Reduced Isomerization” scheme (red dashed lines) (see text for details). Note that the “RACM2 + IEPOX + Reduced Isomerization” scheme is identical to the simulation used in the main text.

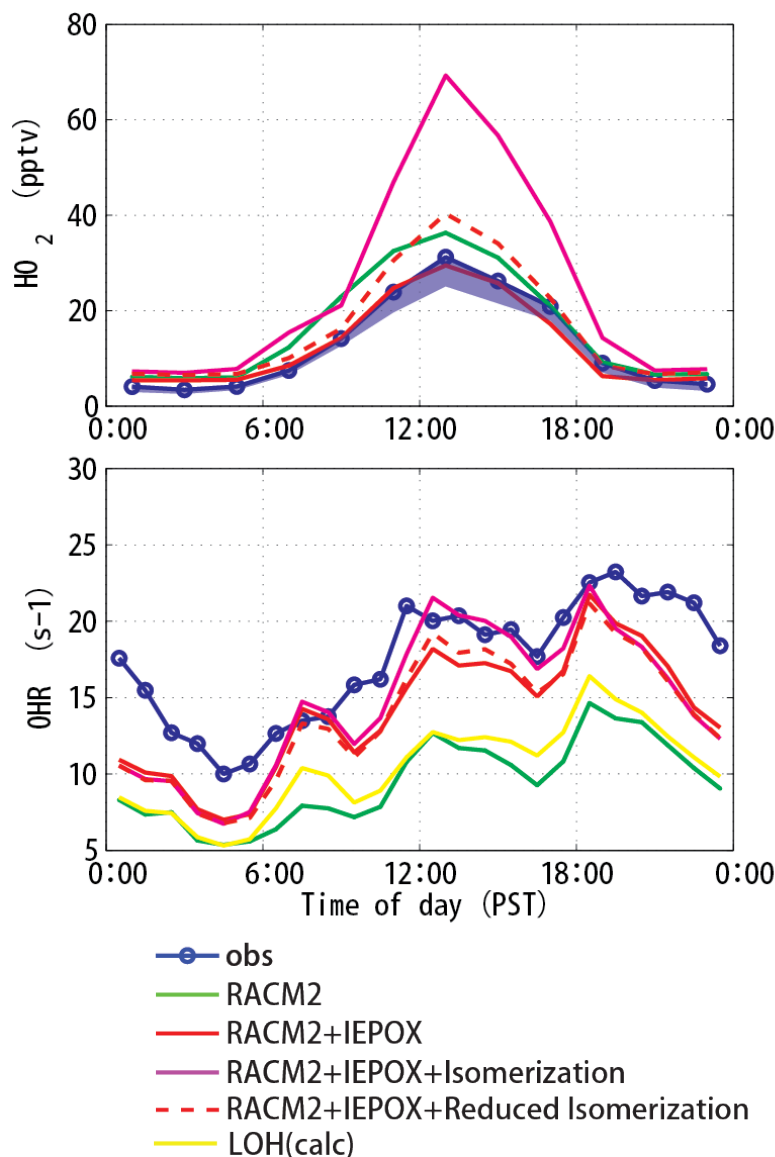

Figure S2. Diurnal cycle of HO<sub>2</sub> (top panel) and OH reactivity (bottom panel) between 20 June and 30 July 2009 near the Blodgett Forest Research Station (BFRS). In the top panel, the shaded area below measured HO<sub>2</sub> (blue open circles) indicates the contribution to measured HO<sub>2</sub> from an RO<sub>2</sub> interference from isoprene, MVK and MACR (Fuchs et al., 2011). In the bottom panel, the calculated OH reactivity from available measurements (LOH) is represented by a yellow line. Model results are shown as the base RACM2 model (green solid lines), the “RACM2 + IEPOX” scheme (red solid lines), the “RACM2 + IEPOX + Isomerization” scheme (magenta solid lines), and the “RACM2 + IEPOX + Reduced Isomerization” scheme (red dashed lines) (see text for details). Note that the “RACM2 + IEPOX + Reduced Isomerization” scheme is identical to the simulation used in the main text. The discrepancy between LOH and RACM2 is mainly due to the species lumping.

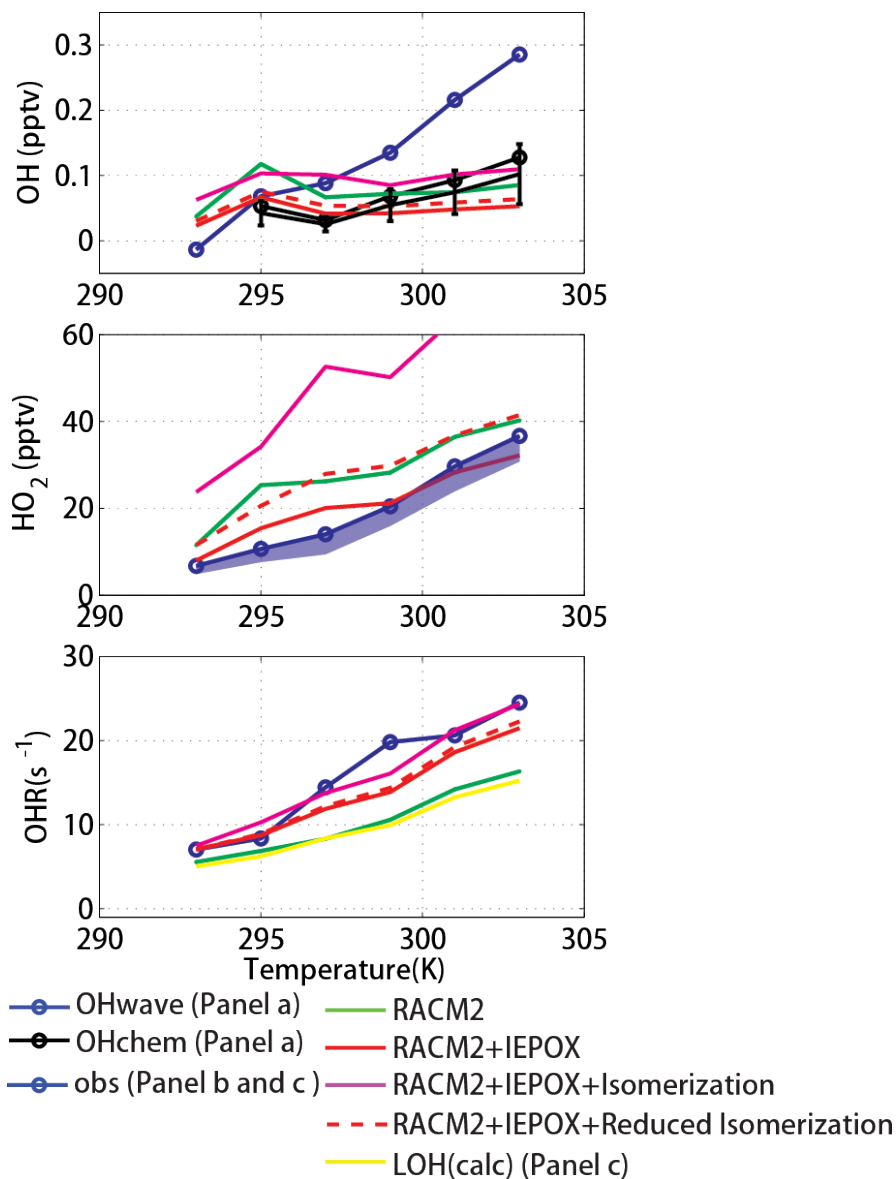

Figure S3 Temperature dependence of (a) daytime measured and modeled OH, (b) daytime measured and modeled HO<sub>2</sub>, and (c) OH reactivity between 9:00 and 15:00 PST during BEARPEX09. In panel (a), “OHwave” is represented by blue open circles and “OHchem” by black open circles. The vertical bars indicate a combined uncertainty ( $\pm 45\%$ ) from the internally generated OH is removed by the C<sub>3</sub>F<sub>6</sub> addition used to measure OHchem (20%), and the absolute uncertainty of the OH measurements ( $\pm 40\%$  at  $2\sigma$  confidence). In panel (b), the shaded area below measured HO<sub>2</sub> (blue open circles) indicates the contribution to measured HO<sub>2</sub> from a RO<sub>2</sub> interference from isoprene, MVK and MACR (Fuchs et al., 2011). In panel (c), the calculated OH reactivity from available measurements is represented by a yellow line. Model results are shown as the base RACM2 model (green solid lines), the “RACM2 + IEPOX” scheme (red solid lines), the

“RACM2 + IEPOX + Isomerization” scheme (magenta solid lines), and the “RACM2 + IEPOX + Reduced Isomerization” scheme (red dashed lines) (see text for details). Note that the “RACM2 + IEPOX + Reduced Isomerization” scheme is identical to the simulation used in the main text.

Table S1 Other measured species and their averaged concentrations (Unit: pptv) <sup>a</sup>

| Species                       | Daytime Conc<br>(9am-3pm) | 24h average                     | Measured by                      | Height                 |
|-------------------------------|---------------------------|---------------------------------|----------------------------------|------------------------|
| Glyoxal                       | 64 ± 33                   | 65 ± 36                         | Laser-Induced<br>Phosphorescence | 2m, 3m, 9m<br>,18m     |
| HCHO                          | 4300 ± 2200               | 4600 ± 2300                     | Laser-Induced<br>Fluorescence    | 2m, 3m, 9m<br>,18m     |
| Glycolaldehyde                | 1110 ± 694                | 1108 ± 673                      | CIMS                             | 18m                    |
| H <sub>2</sub> O <sub>2</sub> | 1105 ± 348                | 822 ± 396                       | CIMS                             | 18m                    |
| Hydroxyacetone                | 697 ± 460                 | 760 ± 460                       | CIMS                             | 18m                    |
| Acetone                       | 3300 ± 1300               | 3600 ± 1300                     | GC-FID/PTR-MS                    | 2, 6, 10, 14,<br>18m   |
| Acetonitrile                  | 150 ± 50                  | 160 ± 50                        | PTR-MS                           | 2, 6, 10, 14,<br>18m   |
| Acetaldehyde                  | 1500 ± 800                | 1900 ± 1000                     | PTR-MS                           | 2, 6, 10, 14,<br>18m   |
| α-Pinene                      | 100 ± 60                  | 210 ± 160                       | GC-FID                           | 18m                    |
| β-Pinene                      | 70 ± 40                   | 130 ± 90                        | GC-FID                           | 18m                    |
| Butane                        | 160 ± 180                 | 170 ± 190                       | GC-FID                           | 18m                    |
| Butanol                       | 3100 ± 800                | 3700 ± 1300                     | GC-FID                           | 18m                    |
| Camphene                      | 9.4 ± 6.7                 | 13 ± 9.6                        | GC-FID                           | 18m                    |
| Isobutylalcohol               | 120 ± 60                  | 130 ± 50                        | GC-FID                           | 18m                    |
| Isoprene                      | 1700 ± 800                | 1.4 ± 0.7) ×<br>10 <sup>3</sup> | GC-FID                           | 18m                    |
| MVK                           | 570 ± 400                 | 540 ± 390                       | GC-FID/PTR-MS                    | 18m                    |
| MACR                          | 220 ± 160                 | 230 ± 160                       | GC-FID/PTR-MS                    | 18m                    |
| MBO                           | 3000 ± 1600               | 2200 ± 1900                     | GC-FID/PTR-MS                    | 2, 6, 10, 14,<br>18m   |
| Sum of<br>Sesquiterpenes      | 62 ± 44                   | 83 ± 68                         | PTR-MS                           | 2, 6, 10, 14,<br>18m   |
| MethylChavicol                | 62 ± 40                   | 98 ± 90                         | PTR-MS                           | 2, 6, 10, 14,<br>18m   |
| Methanol                      | 13700 ± 5400              | 16300 ±<br>8100                 | PTR-MS                           | 2, 6, 10, 14,<br>18m   |
| Ethanol                       | 1700 ± 700                | 800 ± 700                       | GC-FID                           | 18m                    |
| Benzene                       | 48 ± 31                   | 62 ± 40                         | PTR-MS                           | 2, 6, 10, 14,<br>18m   |
| Toluene                       | 195 ± 129                 | 253 ± 185                       | GC-FID                           | 18m                    |
| HNO <sub>3</sub>              | 330 ± 20                  | 320 ± 60                        | TD-LIF                           | 18m                    |
| MPAN                          | 29 ± 15                   | 19 ± 15                         | CIMS                             | 1,2 ,6, 10, 14,<br>18m |
| PAN                           | 275 ± 199                 | 248 ± 171                       | CIMS                             | 1,2 ,6, 10, 14,<br>18m |
| PPN                           | 15 ± 16                   | 13 ± 16                         | CIMS                             | 1,2 ,6, 10, 14,        |

|                              |                                 |                                 |                                   |                      |
|------------------------------|---------------------------------|---------------------------------|-----------------------------------|----------------------|
|                              |                                 |                                 |                                   | 18m                  |
| NO <sub>2</sub> <sup>b</sup> | 200 ± 200                       | 800 ± 3300                      | TD-LIF                            | 1, 4, 9, 18 m        |
| NO <sup>b</sup>              | 74 ± 240                        | 300 ± 4300                      | Chemiluminescence                 | 1, 4, 9, 18 m        |
| HONO                         | 15 ± 10                         | 33 ± 31                         | Wet chemistry                     | 14 m                 |
| CO                           | (130 ± 28) ×<br>10 <sup>3</sup> | (137 ± 29) ×<br>10 <sup>3</sup> | TECO 48C                          | 12.5 m               |
| O <sub>3</sub>               | (54 ± 8) × 10 <sup>3</sup>      | (53 ± 11) ×<br>10 <sup>3</sup>  | Dasibi 1008-PC<br>Ozone Analyzers | 2, 6, 10, 14,<br>18m |

<sup>a</sup> Total alkyl nitrates are not included due to the lack of detailed speciation.

<sup>b</sup> NO and NO<sub>2</sub> were influenced by generator plumes at night.



Table S2 OH yield from ozonolysis of terpenes

| Species                                                   | Yield           | Reference                  |
|-----------------------------------------------------------|-----------------|----------------------------|
| $\beta$ -caryophyllene (C <sub>15</sub> H <sub>24</sub> ) | 0.16 $\pm$ 0.4  | Winterhalter et al. (2009) |
| Camphene                                                  | <0.18           | Atkinson et al. (1992)     |
| 2-Carene                                                  | 0.81 $\pm$ 0.11 | Aschmann et al. (2002)     |
| 3-Carene                                                  | 0.86 $\pm$ 0.11 | Aschmann et al. (2002)     |
| Limonene                                                  | 0.67 $\pm$ 0.10 | Aschmann et al. (2002)     |
| Myrcene                                                   | 0.63 $\pm$ 0.09 | Aschmann et al. (2002)     |
| $\beta$ -Phellandrene                                     | 0.14            | Atkinson et al. (1992)     |
| $\alpha$ -Pinene                                          | 0.77 $\pm$ 0.10 | Aschmann et al. (2002)     |
| $\beta$ -Pinene                                           | 0.35            | Atkinson et al. (1992)     |
| Ocimene                                                   | 0.55 $\pm$ 0.09 | Atkinson et al. (1992)     |
| Sabinene                                                  | 0.33 $\pm$ 0.05 | Atkinson et al. (1992)     |
| $\alpha$ -Terpinene                                       | 0.38 $\pm$ 0.05 | Aschmann et al. (2002)     |
| $\gamma$ -Terpinene                                       | 0.81 $\pm$ 0.11 | Aschmann et al. (2002)     |
| Terpinolene                                               | 0.74 $\pm$ 0.10 | Atkinson et al. (1992)     |
| Linalool                                                  | 0.66 $\pm$ 0.10 | Atkinson et al. (1995)     |
| $\alpha$ -Phellandrene                                    | 0.34 $\pm$ 0.08 | Herrmann et al. (2010)     |

#### Reference

Aschmann, S. M., Arey, J., and Atkinson, R.: OH radical formation from the gas-phase reactions of O<sub>3</sub> with a series of terpenes, *Atmos. Environ.*, 36, 4347-4355, 2002.

Atkinson, R., Aschmann, S. M., Arey, J., and Shorees, B.: Formation of OH Radicals in the Gas Phase Reactions of O<sub>3</sub> With a Series of Terpenes, *J. Geophys. Res.*, 97, 6065-6073, 10.1029/92jd00062, 1992.

Atkinson, R., Arey, J., Aschmann, S. M., Corchnoy, S. B., and Shu, Y.: Rate constants for the gas-phase reactions of cis-3-Hexen-1-ol, cis-3-Hexenylacetate, trans-2-Hexenal, and Linalool with OH and NO<sub>3</sub> radicals and O<sub>3</sub> at 296  $\pm$  2 K, and OH radical formation yields from the O<sub>3</sub> reactions, *Int. J. Chem. Kinet.*, 27, 941-955, 10.1002/kin.550271002, 1995.

Carrasco, N., Doussin, J. F., O'Connor, M., Wenger, J. C., Picquet-Varrault, B., Durand-Jolibois, R., and Carlier, P.: Simulation chamber studies of the atmospheric oxidation of 2-methyl-3-buten-2-ol: Reaction with hydroxyl radicals and ozone under a variety of conditions, *J. Atmos. Chem.*, 56, 33-55, 10.1007/s10874-006-9041-y, 2007.

Chan, A. W. H., Galloway, M. M., Kwan, A. J., Chhabra, P. S., Keutsch, F. N., Wennberg, P. O., Flagan, R. C., and Seinfeld, J. H.: Photooxidation of 2-Methyl-3-Buten-2-ol as a Potential Source of Secondary Organic Aerosol (vol 43, pg 4647, 2009), *Environ. Sci. Technol.*, 43, 8470, 10.1021/es902789a, 2009.

- Crouse, J. D., Paulot, F., Kjaergaard, H. G., and Wennberg, P. O.: Peroxy radical isomerization in the oxidation of isoprene, *PCCP Phys. Chem. Chem. Phys.*, 2011.
- Fuchs, H., Bohn, B., Hofzumahaus, A., Holland, F., Lu, K. D., Nehr, S., Rohrer, F., and Wahner, A.: Detection of HO<sub>2</sub> by laser-induced fluorescence: calibration and interferences from RO<sub>2</sub> radicals, *Atmos. Meas. Tech.*, 4, 1209-1225, 10.5194/amt-4-1209-2011, 2011.
- Henderson, B. H., Pinder, R. W., Crooks, J., Cohen, R. C., Hutzell, W. T., Sarwar, G., Goliff, W. S., Stockwell, W. R., Fahr, A., Mathur, R., Carlton, A. G., and Vizuete, W.: Evaluation of simulated photochemical partitioning of oxidized nitrogen in the upper troposphere, *Atmos. Chem. Phys.*, 11, 275-291, 10.5194/acp-11-275-2011, 2011.
- Herrmann, F., Winterhalter, R., Moortgat, G. K., and Williams, J.: Hydroxyl radical (OH) yields from the ozonolysis of both double bonds for five monoterpenes, *Atmos. Environ.*, 44, 3458-3464, 10.1016/j.atmosenv.2010.05.011, 2010.
- Paulot, F., Crouse, J. D., Kjaergaard, H. G., Kroll, J. H., Seinfeld, J. H., and Wennberg, P. O.: Isoprene photooxidation: new insights into the production of acids and organic nitrates, *Atmos. Chem. Phys.*, 9, 1479-1501, 2009a.
- Paulot, F., Crouse, J. D., Kjaergaard, H. G., Kurten, A., St Clair, J. M., Seinfeld, J. H., and Wennberg, P. O.: Unexpected Epoxide Formation in the Gas-Phase Photooxidation of Isoprene, *Science*, 325, 730-733, 10.1126/science.1172910, 2009b.
- Peeters, J., Nguyen, T. L., and Vereecken, L.: HO<sub>x</sub> radical regeneration in the oxidation of isoprene, *PCCP Phys. Chem. Chem. Phys.*, 11, 5935-5939, 10.1039/b908511d, 2009.
- Peeters, J., and Müller, J. F.: HO<sub>x</sub> radical regeneration in isoprene oxidation via peroxy radical isomerisations. II: experimental evidence and global impact, *PCCP Phys. Chem. Chem. Phys.*, 12, 14227-14235, 10.1039/c0cp00811g, 2010.
- Steiner, A. L., Tonse, S., Cohen, R. C., Goldstein, A. H., and Harley, R. A.: Biogenic 2-methyl-3-buten-2-ol increases regional ozone and HO<sub>x</sub> sources, *Geophys. Res. Lett.*, 34, 10.1029/2007gl030802, 2007.
- Winterhalter, R., Herrmann, F., Kanawati, B., Nguyen, T. L., Peeters, J., Vereecken, L., and Moortgat, G. K.: The gas-phase ozonolysis of beta-caryophyllene (C<sub>15</sub>H<sub>24</sub>). Part I: an experimental study, *PCCP Phys. Chem. Chem. Phys.*, 11, 4152-4172, 10.1039/b817824k, 2009.
- Wolfe, G. M., and Thornton, J. A.: The Chemistry of Atmosphere-Forest Exchange (CAFE) Model – Part 1: Model description and characterization, *Atmos. Chem. Phys.*, 11, 77-101, 10.5194/acp-11-77-2011, 2011.
